# Supplementary material
Source: PubMed Central journal article supplement (PMC5815327)
Supplement: NIHMS924312-supplement-Supp_info.pdf [file NIHMS924312-supplement-Supp_info.pdf]

## Supporting Information

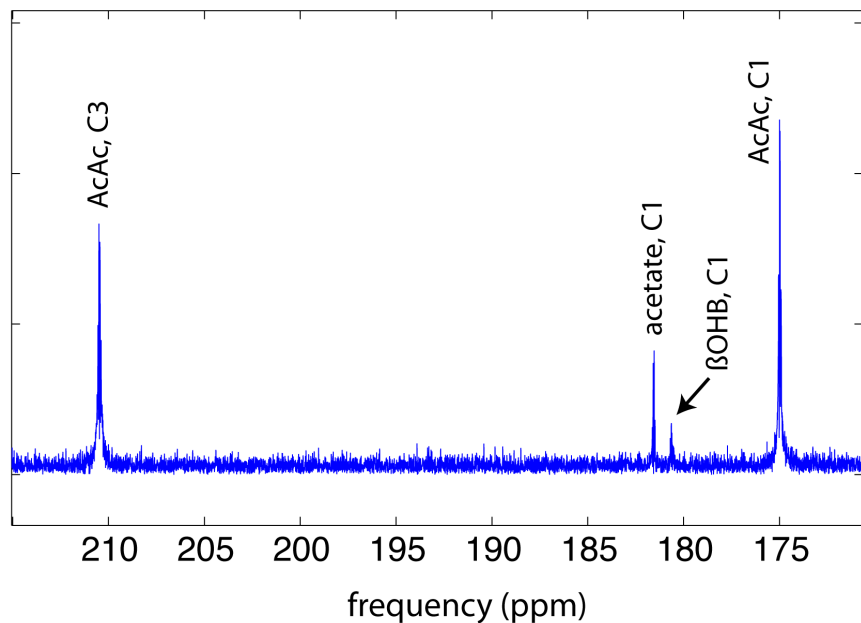

*Supporting Figure S1.* NMR spectrum (magnitude) of [1,3-<sup>13</sup>C<sub>2</sub>]acetoacetate sample preparation spiked with βOHB (natural abundance), acquired at 11.7T. The βOHB (C1) peak is observed at 180.6ppm, referenced to acetoacetate (C1) at 175ppm.

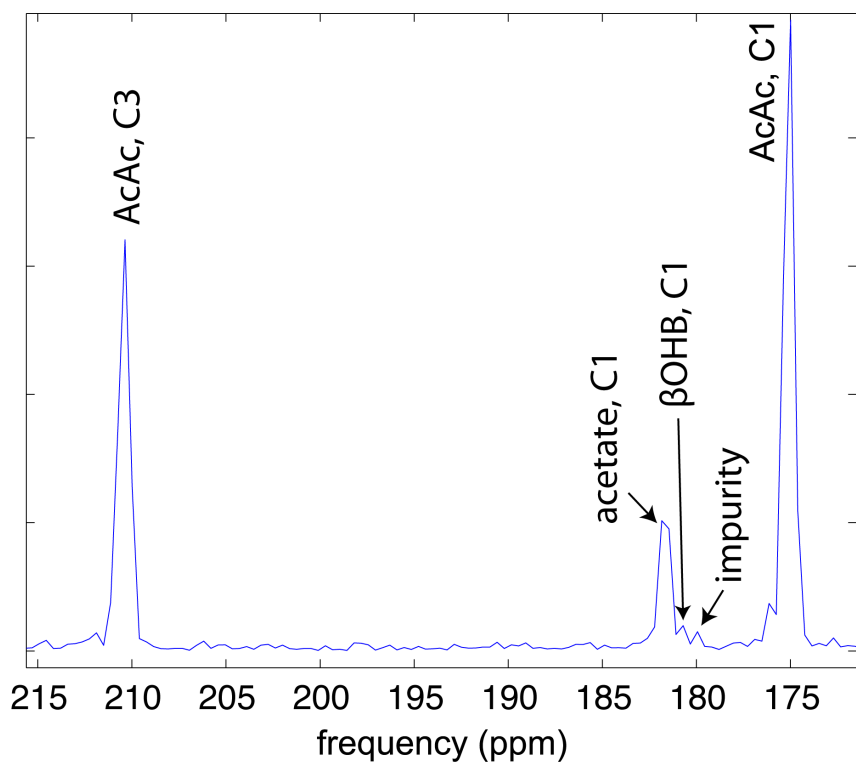

*Supporting Figure S2.* In vivo HP [1,3-<sup>13</sup>C<sub>2</sub>]acetoacetate kidney slab spectra acquired from a normal (untreated) Sprague Dawley rat, showing both metabolic product HP βOHB and an unidentified impurity, as described in text.
